# Supplementary material for: Rodents as Hosts of Pathogens and Related Zoonotic Disease Risk
Source: PubMed Central journal article supplement (PMC7157691; doi:10.3390/pathogens9030202), 2020-03-10
Supplement: pathogens-09-00202-s001.pdf [file pathogens-09-00202-s001.pdf]

## Supplementary documents:

**Table S1.** The list of negative and positive DNA controls, used to confirm the sensitivity and specificity of the PCR systems designed for this study.

| <b>Microorganism</b> | <b>Name</b>                                    | <b>Origin</b>           |
|----------------------|------------------------------------------------|-------------------------|
| Bacteria             | <i>Staphylococcus haemolyticus</i>             | Laboratory colony       |
| Bacteria             | <i>Staphylococcus aureus</i>                   | Laboratory colony       |
| Bacteria             | <i>Rickettsia felis</i>                        | Laboratory colony       |
| Bacteria             | <i>Wolbachia</i> PL13                          | Laboratory colony       |
| Bacteria             | <i>Stenotrophomonas maltophilia</i>            | Laboratory colony       |
| Bacteria             | <i>Acinetobacter</i> sp.                       | Laboratory colony       |
| Bacteria             | <i>Enterobacter aerogenes</i>                  | Laboratory colony       |
| Bacteria             | <i>Yersinia pestis</i>                         | Laboratory colony       |
| Bacteria             | <i>Rickettsia montanensis</i>                  | Laboratory colony       |
| Lice                 | Head lice ( <i>Pediculus humanus capitis</i> ) | Homo sapiens (Amazonia) |
| Lice                 | <i>Pediculus humanus</i>                       | Laboratory breeding     |
| Bacteria             | <i>Ehrlichia</i>                               | Laboratory colony       |
| Bacteria             | <i>Coxiella burnetii</i>                       | Laboratory colony       |
| Bacteria             | <i>Borrelia recurrentis</i>                    | Laboratory colony       |
| Bacteria             | <i>Staphylococcus hominis</i>                  | Laboratory colony       |
| Bacteria             | <i>Asaia bogorensis</i>                        | Laboratory colony       |
| Bacteria             | <i>Haemophilus influenzae</i>                  | Laboratory colony       |
| Bacteria             | <i>Wolbachia</i>                               | Laboratory colony       |
| Bacteria             | <i>Anaplasma phagocytophilum</i>               | Laboratory colony       |
| Bacteria             | <i>Enterobacter aerogenes</i>                  | Laboratory colony       |
| Bacteria             | <i>Acinetobacter baumannii</i>                 | Laboratory colony       |

|          |                                        |                   |
|----------|----------------------------------------|-------------------|
| Bacteria | <i>Streptococcus pneumoniae</i>        | Laboratory colony |
| Bacteria | <i>Salmonella enterica</i>             | Laboratory colony |
| Bacteria | <i>Citrobacter koseri</i>              | Laboratory colony |
| Bacteria | <i>Gardnerella vaginalis</i>           | Laboratory colony |
| Bacteria | <i>Streptococcus pyogenes</i>          | Laboratory colony |
| Parasite | <i>Plasmodium falciparum</i>           | Laboratory colony |
| Bacteria | <i>Rickettsia typhi</i>                | Laboratory colony |
| Bacteria | <i>Enterococcus faecium</i>            | Laboratory colony |
| Bacteria | <i>Streptococcus agalactiae</i>        | Laboratory colony |
| Bacteria | <i>Rickettsia conorii</i>              | Laboratory colony |
| Bacteria | <i>Asaia bogorensis</i>                | Laboratory colony |
| Bacteria | <i>Bacillus thuringiensis</i>          | Laboratory colony |
| Tick     | <i>Amblyomma variegatum</i>            | Senegal           |
| Dog      | DH62 cell line                         | Cell line         |
| Tick     | BME ( <i>Rhipicephalus microplus</i> ) | Cell line         |
| Horse    | CV.G 22 ( <i>Equus caballus</i> )      | French Guiana     |
| Donkey   | ANE 4 ( <i>Equus asinus</i> )          | Egypt             |
| Human    | HL60 cell line ( <i>Homo sapiens</i> ) | Cell line         |
| Mouse    | L929 cell line                         | Cell line         |
| Flea     | <i>Ctenocephalides felis</i>           | Laboratory colony |
| Bedbugs  | <i>Cimex lectularius</i>               | Laboratory colony |
| Tick     | <i>Hyalomma marginatum</i>             | Senegal           |
| Bacteria | <i>Bartonella henselae</i>             | Laboratory colony |
| Bacteria | <i>Bartonella</i> sp.                  | Laboratory colony |
| Bacteria | <i>Rickettsia canadensis</i>           | Laboratory colony |
| Bacteria | <i>Bartonella quintana</i>             | Laboratory colony |

|          |                                     |                   |
|----------|-------------------------------------|-------------------|
| Bacteria | <i>Rickettsia australis</i>         | Laboratory colony |
| Bacteria | <i>Borrelia crocudurae</i>          | Laboratory colony |
| Parasite | <i>Hepatozoon canis</i>             | Laboratory colony |
| Parasite | <i>Dirofilaria immitis</i>          | Laboratory colony |
| Parasite | <i>Trypanosoma evansi</i>           | Laboratory colony |
| Parasite | <i>Leishmania</i>                   | Laboratory colony |
| Parasite | <i>Leishmania major</i>             | Laboratory colony |
| Parasite | <i>Trypanosoma congolense</i>       | Laboratory colony |
| Parasite | <i>Trypanosoma gambiense</i>        | Laboratory colony |
| Bacteria | <i>Streptobacillus moniliformis</i> | Laboratory colony |
| Bacteria | <i>Borrelia theileri</i>            | Laboratory colony |
| Bacteria | <i>Borrelia</i> sp.                 | Laboratory colony |
| Bacteria | <i>Vibrio cholerae</i>              | Laboratory colony |
| Bacteria | <i>Treponema pallidum</i>           | Laboratory colony |
